# Supplementary material
Source: MDPI journal article supplement (https://www.mdpi.com/2072-4292/14/15/3822)
Supplement: s1 [file s1]

**Table S1.** Details of satellite datasets used for reclamation classification in Shandong coastal zone.

| Dataset        | Spatial Resolution                                         | Temporal Resolution | Acquisition Time | Path/Row | Cloud Cover |
|----------------|------------------------------------------------------------|---------------------|------------------|----------|-------------|
| Landsat 5 TM   | 30m (reflective);<br>120m (thermal)                        | 16 days             | 1990-10-08       | 119/34   | 0.03%       |
|                |                                                            |                     | 1990-10-08       | 119/35   | 0.01%       |
|                |                                                            |                     | 1990-10-15       | 120/34   | —           |
|                |                                                            |                     | 1990-10-15       | 120/35   | —           |
|                |                                                            |                     | 1990-10-31       | 120/36   | 0.37%       |
|                |                                                            |                     | 1990-06-16       | 121/34   | 11.01%      |
|                |                                                            |                     | 1990-10-29       | 122/33   | —           |
|                |                                                            |                     | 1990-10-13       | 122/34   | 3.00%       |
| Landsat 7 ETM+ | 30m (reflective);<br>60m (thermal);<br>15m (Panchromatic)  | 16 days             | 2000-11-28       | 119/34   | 0.06%       |
|                |                                                            |                     | 2000-11-12       | 119/35   | 7.51%       |
|                |                                                            |                     | 2000-11-03       | 120/34   | —           |
|                |                                                            |                     | 2000-11-03       | 120/35   | 2.4%        |
|                |                                                            |                     | 2000-11-03       | 120/36   | —           |
|                |                                                            |                     | 2000-08-06       | 121/34   | 13.13%      |
|                |                                                            |                     | 2000-11-17       | 122/33   | 0.21%       |
|                |                                                            |                     | 2000-11-01       | 122/34   | —           |
|                |                                                            |                     | 2007-10-15       | 119/34   | 1.40%       |
|                |                                                            |                     | 2007-10-15       | 119/35   | 7.80%       |
|                |                                                            |                     | 2007-11-07       | 120/34   | 0.08%       |
|                |                                                            |                     | 2007-10-22       | 120/35   | 0.20%       |
|                |                                                            |                     | 2007-10-22       | 120/36   | 0.64%       |
|                |                                                            |                     | 2007-09-11       | 121/34   | 0.31%       |
|                |                                                            |                     | 2007-10-20       | 122/33   | 0.04%       |
|                |                                                            |                     | 2007-10-20       | 122/34   | 0.03%       |
| Landsat 8 OLI  | 30m (reflective);<br>100m (thermal);<br>15m (Panchromatic) | 16 days             | 2017-12-21       | 119/34   | 0.59%       |
|                |                                                            |                     | 2017-12-21       | 119/35   | 0.26%       |
|                |                                                            |                     | 2017-11-10       | 120/34   | 1.05%       |
|                |                                                            |                     | 2017-12-12       | 120/35   | 1.25%       |
|                |                                                            |                     | 2017-11-26       | 120/36   | 1.00%       |
|                |                                                            |                     | 2017-12-19       | 121/34   | 1.56%       |
|                |                                                            |                     | 2017-11-24       | 122/33   | 2.25%       |
|                |                                                            |                     | 2017-11-24       | 122/34   | 0.21%       |
|                |                                                            |                     | 2021-11-14       | 119/34   | 0.51%       |
|                |                                                            |                     | 2021-11-14       | 119/35   | 0.24%       |
|                |                                                            |                     | 2021-12-07       | 120/34   | 0.28%       |
|                |                                                            |                     | 2021-12-07       | 120/35   | 1.09%       |
|                |                                                            |                     | 2021-12-07       | 120/36   | 10.81%      |
|                |                                                            |                     | 2021-11-12       | 121/34   | 0.24%       |
|                |                                                            |                     | 2021-12-21       | 122/33   | 2.50%       |
|                |                                                            |                     | 2021-12-05       | 122/34   | 1.50%       |

**Table S2.** The main purposes of each reclamation activity.

| <b>Reclamation activity</b>      | <b>Main purposes</b>                                                                                                                                                             |
|----------------------------------|----------------------------------------------------------------------------------------------------------------------------------------------------------------------------------|
| Enclosed mariculture             | Breeding economic aquatic plants or animals.                                                                                                                                     |
| Saltern                          | Manufacturing sea salt.                                                                                                                                                          |
| Fishery infrastructure           | Breeding important germplasm resources;<br>docking/loading/unloading/sheltering fishing boats.                                                                                   |
| Coastal industrial construction  | Manufacturing ships; generating electricity.                                                                                                                                     |
| Tourism infrastructure           | Providing coastal tourism services for tourists.                                                                                                                                 |
| Port                             | Docking/loading/unloading/sheltering/maneuvering<br>cargo/passenger vessels.                                                                                                     |
| Urbanization                     | Building towns to provide living areas for coastal residents.                                                                                                                    |
| Others                           | Reservoirs: controlling flood and regulating runoff;<br>Coastal protection engineering: protecting coastal towns,<br>farmland, salterns and beaches; resisting the storm damage. |
| Unused infilled reclamation area | Subsequent use for urban construction or industrial<br>manufacturing.                                                                                                            |
| Unused enclosed reclamation area | Subsequent use as aquaculture ponds, harbor pond, or<br>industrial reservoirs.                                                                                                   |
